# Supplementary material for: Nearly 20 Years of Genetic Diversity and Evolution of Porcine Circovirus-like Virus P1 from China
Source: MDPI journal article supplement (doi:10.3390/v14040696), 2022-03-28
Supplement: s1 [file s1]

Table S1. Summary of obtained P1 strains in this study.

| No. | GenBank<br>accession no. | Strain name    | Collection<br>date | Host   | length |
|-----|--------------------------|----------------|--------------------|--------|--------|
| 1   | EF514716                 | HB1            | 2005               | Pig    | 648    |
| 2   | JF803741                 | Czly           | 2009               | Pig    | 648    |
| 3   | JF918544                 | Jiangsu/2010   | 2010               | Pig    | 648    |
| 4   | JN040276                 | NJLH           | 2011               | Pig    | 648    |
| 5   | JN040277                 | HAHZ           | 2011               | Pig    | 648    |
| 6   | JN040278                 | CZJT           | 2011               | Pig    | 648    |
| 7   | JN040279                 | CHAH           | 2010               | Pig    | 648    |
| 8   | JN104035                 | CHHEN          | 2011               | Pig    | 648    |
| 9   | JN104036                 | NTTZ           | 2010               | Pig    | 648    |
| 10  | JN104037                 | WXYX           | 2010               | Pig    | 648    |
| 11  | JN104038                 | CHHEB          | 2011               | Pig    | 648    |
| 12  | JN104039                 | JSHA           | 2010               | Pig    | 648    |
| 13  | JN207908                 | ZJJH           | 2011               | Pig    | 648    |
| 14  | JN207909                 | AHSZ           | 2011               | Pig    | 648    |
| 15  | JN207910                 | JSLYG          | 2010               | Pig    | 648    |
| 16  | JN207911                 | ZJQZ           | 2011               | Pig    | 648    |
| 17  | JN207912                 | ZJSX           | 2009               | Pig    | 648    |
| 18  | JN207913                 | ZJHZ           | 2010               | Pig    | 648    |
| 19  | JN207914                 | ZJNB           | 2011               | Pig    | 648    |
| 20  | JN207915                 | CHHEB2         | 2011               | Pig    | 648    |
| 21  | KJ612072                 | JSNJ           | 2014               | Pig    | 648    |
| 22  | KU143774                 | JSXZ           | 2015               | Pig    | 648    |
| 23  | KU243695                 | JSPZ           | 2015               | Pig    | 648    |
| 24  | KU254645                 | HBA01          | 2015               | Pig    | 648    |
| 25  | KU323639                 | SYD1207        | 2015               | Pig    | 648    |
| 26  | KU323640                 | NSd29          | 2015               | Pig    | 648    |
| 27  | KU324510                 | NSE02          | 2015               | Pig    | 648    |
| 28  | KU324511                 | YX35FX         | 2015               | Pig    | 648    |
| 29  | KU350633                 | YX25           | 2015               | Pig    | 648    |
| 30  | KU350634                 | BYXT           | 2015               | Pig    | 648    |
| 31  | KU356936                 | 4PZ-1          | 2015               | Pig    | 648    |
| 32  | KU356937                 | 2PZ-1          | 2015               | Pig    | 648    |
| 33  | KU356938                 | E061362        | 2015               | Pig    | 648    |
| 34  | KU356939                 | E051344        | 2015               | Pig    | 648    |
| 35  | KU356940                 | PZ4S20151025FX | 2015               | Pig    | 648    |
| 36  | KU356941                 | PZ1F20151025   | 2015               | Pig    | 648    |
| 37  | KY462783                 | JSDY           | 2016               | Cattle | 648    |
| 38  | KY462784                 | JSJN           | 2016               | Cattle | 648    |
| 39  | KY462785                 | JSNJ           | 2016               | Rabbit | 648    |
| 40  | KY462786                 | JSZJ           | 2016               | Rabbit | 648    |
| 41  | KY462787                 | JSXZ           | 2016               | Goat   | 648    |

|    |          |          |      |      |     |
|----|----------|----------|------|------|-----|
| 42 | KY462788 | JSLYG    | 2017 | Goat | 648 |
| 43 | MF716583 | PZ1      | 2016 | Pig  | 648 |
| 44 | MF716584 | PZ2      | 2016 | Pig  | 648 |
| 45 | MF716585 | PZ3      | 2016 | Pig  | 648 |
| 46 | MF802833 | SQ       | 2017 | Pig  | 648 |
| 47 | MG708301 | ZJK01    | 2017 | Pig  | 648 |
| 48 | MG708302 | ZJK02    | 2017 | Pig  | 647 |
| 49 | MG708303 | ZJK03    | 2017 | Pig  | 648 |
| 50 | MG708304 | QHD      | 2017 | Pig  | 648 |
| 51 | MG708305 | BD       | 2017 | Pig  | 648 |
| 52 | MG708306 | SJZ      | 2017 | Pig  | 648 |
| 53 | MG708307 | XT01     | 2017 | Pig  | 648 |
| 54 | MG708308 | XT02     | 2017 | Pig  | 648 |
| 55 | MG708309 | XT       | 2017 | Pig  | 648 |
| 56 | MG708310 | HS01     | 2017 | Pig  | 648 |
| 57 | MG708311 | HS02     | 2017 | Pig  | 648 |
| 58 | MG708312 | CZ       | 2017 | Pig  | 648 |
| 59 | MH167398 | HeB01    | 2013 | Pig  | 648 |
| 60 | MH167399 | HeB02    | 2014 | Pig  | 648 |
| 61 | MH167400 | HeN01    | 2013 | Pig  | 648 |
| 62 | MH167401 | SD01     | 2014 | Pig  | 648 |
| 63 | MH167402 | AnH01    | 2013 | Pig  | 648 |
| 64 | MH167403 | AnH02    | 2014 | Pig  | 648 |
| 65 | MH167404 | ZhJ01    | 2014 | Pig  | 648 |
| 66 | MH167405 | JS01     | 2013 | Pig  | 648 |
| 67 | MH379143 | NJ01     | 2018 | Dog  | 648 |
| 68 | MH379144 | NJ02     | 2018 | Dog  | 648 |
| 69 | MH445290 | HuN01    | 2017 | Pig  | 648 |
| 70 | MH445291 | HuN02    | 2017 | Pig  | 648 |
| 71 | MH445292 | HuN03    | 2017 | Pig  | 648 |
| 72 | MH445293 | HuN04    | 2018 | Pig  | 648 |
| 73 | MT318811 | HeB01    | 2019 | Dog  | 648 |
| 74 | MT318812 | HeB02    | 2019 | Dog  | 648 |
| 75 | MT318820 | NJ01     | 2018 | Cat  | 648 |
| 76 | MT318821 | NJ02     | 2018 | Cat  | 648 |
| 77 | MT318822 | NJ03     | 2019 | Cat  | 648 |
| 78 | MT318823 | HeB01    | 2018 | Cat  | 648 |
| 79 | MT318824 | HeB02    | 2019 | Cat  | 648 |
| 80 | MW263905 | Tibet-P1 | 2020 | Yak  | 648 |
| 81 | NC036593 | PZ1      | 2016 | Pig  | 648 |
| 82 | OL581721 | JS02c    | 2014 | Pig  | 649 |
| 83 | OL581722 | JS03c    | 2004 | Pig  | 649 |
| 84 | OL581723 | HuN06c   | 2017 | Pig  | 649 |
| 85 | OL792747 | JS20-1   | 2020 | Pig  | 648 |

---

|    |          |        |      |     |     |
|----|----------|--------|------|-----|-----|
| 86 | OL792748 | JS20-2 | 2020 | Pig | 648 |
| 87 | OL792749 | JS20-3 | 2020 | Pig | 648 |
| 88 | OL792750 | JS20-4 | 2020 | Pig | 648 |
| 89 | OL792751 | JS20-5 | 2020 | Pig | 648 |
| 90 | OL792752 | JS20-6 | 2020 | Pig | 648 |
| 91 | OL792753 | JS20-7 | 2020 | Pig | 648 |
| 92 | OL792754 | JS20-8 | 2020 | Pig | 648 |
| 93 | OL792755 | JS20-9 | 2020 | Pig | 649 |
| 94 | OL792756 | JS21-1 | 2021 | Pig | 648 |
| 95 | OL792757 | JS21-2 | 2021 | Pig | 648 |
| 96 | OL792758 | JS21-3 | 2021 | Pig | 648 |

---
